# Supplementary material for: MENGAPA WANITA MEMILIH MOW?(Studi Kasus pada 8 Akseptor KB MOW di Desa Japura Lor Kecamatan Pangenan Kabupaten Cirebon Tahun 2005
Source: Oxford University Press journal article supplement (doi:10.1242/jeb.130948), 2005-01-01
Supplement: jeb130948supp.pdf [file jeb130948supp.pdf]

Table S1. Adult and offspring immune relationships

|                             |                          | r     | P    |
|-----------------------------|--------------------------|-------|------|
| <b>Nestlings</b>            | <b><i>E.coli</i></b>     |       |      |
|                             | Midparent                | -0.06 | 0.83 |
|                             | Mother                   | 0.18  | 0.52 |
|                             | Father                   | -0.20 | 0.47 |
|                             | <b>Agglutination</b>     |       |      |
|                             | Midparent                | -0.29 | 0.42 |
|                             | Mother                   | -0.36 | 0.3  |
| <b>60 day old offspring</b> | Father                   | -0.11 | 0.77 |
|                             | <b><i>E.coli</i></b>     |       |      |
|                             | Midparent                | -0.1  | 0.79 |
|                             | Mother                   | -0.09 | 0.8  |
|                             | Father                   | -0.05 | 0.89 |
|                             | <b><i>C.albicans</i></b> |       |      |
|                             | Midparent                | 0.12  | 0.76 |
|                             | Mother                   | -0.05 | 0.91 |
|                             | Father                   | 0.28  | 0.47 |
|                             | <b>Agglutination</b>     |       |      |
|                             | Midparent                | -0.29 | 0.42 |
|                             | Mother                   | -0.36 | 0.3  |
|                             | Father                   | -0.11 | 0.77 |

There was no correlation found between nestlings and parents for killing of *E.coli* (average of nest for microbial killing between ages 25 and 27 days). Similarly, there was no correlation found between parents and offspring for agglutination of SRBC with all non responders excluded. There was also no correlation between parents and 60 day old offspring with agglutination, killing of *E.coli* or killing of *C.albicans*.
